# Supplementary material
Source: PubMed Central journal article supplement (PMC2709673)
Supplement: ASN.2008080895_1.pdf [file ASN.2008080895_1.pdf]

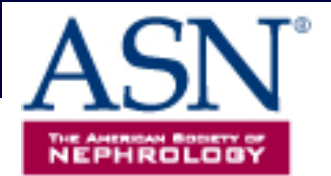

1725 I Street NW • Suite 510 • Washington, DC 20006  
Tel 202-659-0599 • Fax 202-659-0709 • [www.asn-online.org](http://www.asn-online.org)

**EMBARGOED FOR RELEASE UNTIL 5:00 PM ON APRIL 15, 2009**

**Contact:** Shari Leventhal: 202-416-0658, [sleventhal@asn-online.org](mailto:sleventhal@asn-online.org)

## **AT RISK FOR KIDNEY DISEASE? CHECK YOUR GENES**

*Results Explain Why American Indians Have Higher Rates of Proteinuria*

**Washington, DC (April 14, 2009)** — Genetic differences can influence one’s risk of developing proteinuria, a condition that increases the risk of cardiovascular disease and chronic kidney disease (CKD), according to a study appearing in an upcoming issue of the *Journal of the American Society of Nephrology* (JASN). The results may be important for determining patients’ health risks and for devising new medical treatments.

Approximately 12% of people in the United States have proteinuria (abnormal levels of protein lost in the urine), and African Americans and American Indians have higher risks of developing the condition than other groups. Researchers suspect that genetic variation likely accounts for part of their increased risks.

Amy Mottl, MD (University of North Carolina Kidney Center), and her colleagues looked to see if they could identify the genetic causes of American Indians’ increased risk for proteinuria. They studied approximately 3,500 individuals from 13 American Indian tribes enrolled in the Strong Heart Family Study funded by the National Heart, Lung and Blood Institute. The investigators found multiple chromosomal regions that may possess genes that influence variation in proteinuria, especially in the setting of diabetes or hypertension.

The study’s findings are preliminary and additional research is needed to determine which genes influence one’s proteinuria risk. “Further exploration of the candidate genes underlying the chromosomes implicated in our study is warranted,” the authors wrote. This could lead to a better understanding of how proteinuria arises and to the development of new strategies for prevention and treatment.

While this study focused on American Indians, its findings likely apply to the general population as well, where the prevalence of proteinuria is rising.

The authors report no financial disclosures.

**MORE**

---

The article, entitled “Linkage Analysis of Albuminuria,” will appear online at <http://jasn.asnjournals.org/> on April 15, 2009, doi 10.1681/ASN.2008080895.

Founded in 1966, the American Society of Nephrology (ASN) is the world’s largest professional society devoted to the study of kidney disease. Comprised of 11,000 physicians and scientists, ASN continues to promote expert patient care, to advance medical research, and to educate the renal community. ASN also informs policymakers about issues of importance to kidney doctors and their patients. ASN funds research, and through its world-renowned meetings and first-class publications, disseminates information and educational tools that empower physicians.

###
